# Supplementary material
Source: PubMed Central journal article supplement (PMC1138956)

**Supplementary Table 1.** Primers used in the generation of site-directed mutants of rPARG-CF

| <b>Mutation</b> | <b>Primers</b>                                                                                         |
|-----------------|--------------------------------------------------------------------------------------------------------|
| E675N           | 5 - CGTTCATCAAGGAAACCAAATAAGCTTAAAACGCTC - 3<br>3 - GCAAGTAGTTCCTTTGGTTTATTTCGAATTTTGCGAG - 5          |
| E708N           | 5 - GAGTCTTGAAGATTTTCCAAATTGGGAAAGATGTG - 3<br>3 - CTCAGAACTTCTAAAAGGTTTAACCCTTTCTACAC - 5             |
| E728N           | 5 - CGAAGGTACCATAAAATGGAAACGGCCAGGGC - 3<br>3 - GCTTCCATGGTATTTACCTTTGCCGGTCCCG - 5                    |
| D738N           | 5 - GGGCATGCTACAGGTGAATTTTGCAAACCGTTTCG - 3<br>3 - CCCGTACGATGTCCACTTAAAACGTTTGGCAAAGC - 5             |
| E756N           | 5 - GGACTTGTGCAAAACGAAATCCGCT - 3<br>3 - CCTGAACACGTTTTGCTTTAGGCGA - 5                                 |
| E757N           | 5 - CTTGTGCAAGAAAACATCCGCTTTT - 3<br>3 - GAACACGTTCTTTTGTAGGCGAAAA - 5                                 |
| E756N/E757N     | 5 - GCAGGACTTGTGCAAAACAACATCCGCTTTTTAATCAACCC - 3<br>3 - CGTCCTGAACACGTTTTGTTGTAGGCGAAAAATTAGTTGGG - 5 |
| E765N           | 5 - AATCAACCCTAACTTGATTGTTTCACGGC - 3<br>3 - TTAGTTGGGATTGAACTAACAAAGTGCCG - 5                         |
| E774N           | 5 - CGGCTCTTCACTAACGTGCTGGATCAC - 3<br>3 - GCCGAGAAGTGATTGCACGACCTAGTG - 5                             |
| E780N           | 5 - CTGGATCACAATAACTGTCTTATCATCACAGG - 3<br>3 - GACCTAGTGTTATTGACAGAATAGTAGTGTCC - 5                   |
| E788N           | 5 - CACAGGTACTAACCGTACAGTGAATACAC - 3<br>3 - GTGTCCATGAGTTGTCATGTCACTTATGTG - 5                        |

**Supplementary Figure 1. SDS-PAGE of GST-fusion rPARG-CF and of select thrombin cleaved rPARG-CF mutants.** A 12% SDS-PAGE gel was with molecular weight markers indicated by arrows: Lane are as follows: (MW) molecular weight markers, (C) 75  $\mu$ g crude extract, (GSH) proteins bound to 20mL of GSH-Sepharose, (PARG-CF), 5 $\mu$ g wild-type fusion protein rPARG-CF, thrombin cleaved rPARG-CF mutants; (E756N) 5  $\mu$ g, (E757N) 5 $\mu$ g, (E774N) 10  $\mu$ g, (E780N) 15 $\mu$ g , (E788N) 15  $\mu$ g E788N.

Supplementary figure 1

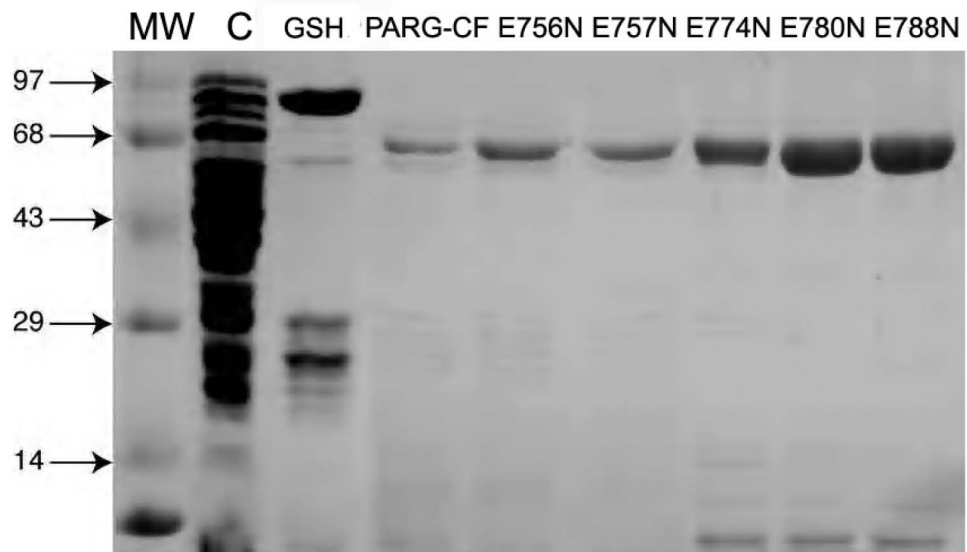

Supplement: bj3880493add.pdf [file bj3880493add.pdf]
